# Supplementary material
Source: publisher figshare collection journal article supplement (https://karger.figshare.com/articles/dataset/_/12529316)
Supplement: Supplementary file 1 [file 1]

| **ADHD presentation** | | **Combined (N =121)** | **Hyperactive/impulsive (N =57)** | **Inattentive (N =69)** | ***P*-value** |
| --- | --- | --- | --- | --- | --- |
| Age, median (IQR) | | 33 (27-42) | 36.0 (31-43) | 36 (29-44) | 0.127 |
| Female gender, N(%) | | 39 (32%) | 14 (24.6%) | 13 (19%) | 0.122 |
| Number of SDEP ≥2, N (%) | | 69 (63%) | 26 (47.3%) | 35 (57%) | 0.165 |
| Number of SUD criteria, median (IQR) | | 9 (6-14) | 7 (5-12) | 9 (6-14) | 0.241 |
| Number of psychiatric diagnoses, N (%) | 0 | 38 (32%) | 23 (40%) | 23 (33%) | 0.222 |
| 1 | 52 (43%) | 25 (44%) | 37 (54%) |
| 2 | 30 (25%) | 9 (16%) | 9 (13%) |

Supplementary Table 1: ADHD presentations and age, gender, and severity indicators associated with “any ADHD”. IQR, interquartile range; SDEP, substance dependence; SUD, substance use disorder.
