# Supplementary material
Source: publisher figshare collection journal article supplement (https://karger.figshare.com/articles/dataset/_/12529316)
Supplement: Supplementary file 1 [file 1]

### ASRS18 score as a function of the number of dependence diagnoses

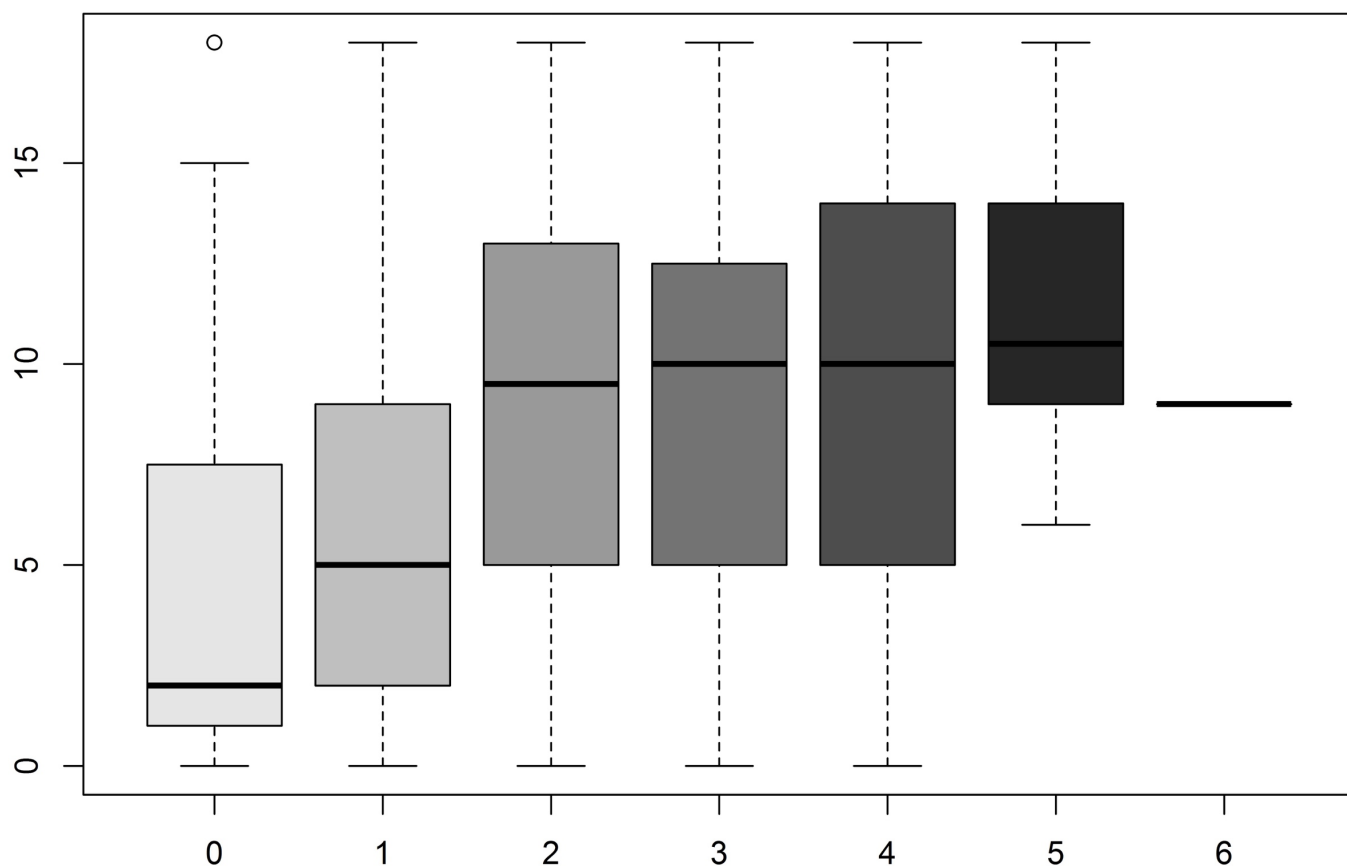

Supplementary Figure 1: ASRS 18 score as a function if the number of DSM-IV dependence diagnoses
